# Supplementary material
Source: PubMed Central journal article supplement (PMC3560487)
Supplement: ijbt0003-0055-f3.pdf [file ijbt0003-0055-f3.pdf]

# Microarray analysis in liver following burn and CLP

## Supplementary materials

### *Quantitative real-time PCR*

qPCR gene expression studies were performed for genes of interest (GOI) as validation of the microarray results. The RNA samples were amplified with Nugen WT Pico Kit (Part# 3300-A01) (NuGEN Technologies Inc, San Carlos, CA, USA). RNA was reversed transcribed into DNA. Then cDNA samples were diluted by 100 times. All the samples were tested in triplicates. qPCR was performed using the ABI 7900 HT Sequence Sequence Detection System (TaqMan; Applied Biosystems, Foster City, CA, USA) using standard fluorescent chemistries and thermal cycling conditions. Primer and probe sequences were designed for each experimental gene's mRNA sequence using Primer Express software (Applied Biosystems) as shown in **Table 3**. For the gene of interest, 6-10 ng of cDNA was mixed with 20  $\mu$ M FWR/Rvse and 10  $\mu$ M (UPL) Probe (UPL). The reference gene GAPDH was added into Rodent GAPDH control kit ABI (Part No.4308313) (TaqMan; Applied Biosystems, Foster City, CA, USA) with 10  $\mu$ M FWR/Rvse and 20  $\mu$ M Probe. Thermal cycling conditions were as specified by the manufacturer: 50°C for 2 min, 95°C for 10 min, and 40 cycles as follows: 95°C for 15 s, ramp to 60°C for 1 min.

### *Analysis of qPCR data*

For the analysis of the qPCR results, averaged normalized data for each experimental gene was compared between B\_CLP groups and SB\_CLP groups using the  $2^{-\Delta\Delta C_t}$  method.

## Microarray analysis in liver following burn and CLP

**Supplementary Table 1.** Full Pathway Analysis By IPA of Genes With Significant Fold Change Between BCLP and SCLP Conditions

| Time (hr) | Up/Down Regulation | Pathway                                                                  | Gene Annotation                                                                                  | p-value  |
|-----------|--------------------|--------------------------------------------------------------------------|--------------------------------------------------------------------------------------------------|----------|
| 2         | Up                 | Phenylalanine, Tyrosine and Tryptophan Biosynthesis                      | <i>Got1, Tat</i>                                                                                 | 0.000398 |
| 2         | Up                 | Circadian Rhythm Signaling                                               | <i>Per1, Cry2</i>                                                                                | 0.001318 |
| 2         | Up                 | Phenylalanine Metabolism                                                 | <i>Got1, Tat</i>                                                                                 | 0.002089 |
| 2         | Up                 | Tyrosine Metabolism                                                      | <i>Got1, Tat</i>                                                                                 | 0.007244 |
| 2         | Up                 | PPAR Signaling                                                           | <i>Cited2, Ppargc1A</i>                                                                          | 0.012303 |
| 2         | Up                 | Glycerophospholipid Metabolism                                           | <i>Etnk1, Got1</i>                                                                               | 0.019055 |
| 2         | Up                 | PPAR $\alpha$ /RXR $\alpha$ Activation                                   | <i>Cd36, Ppargc1A</i>                                                                            | 0.034674 |
| 2         | Up                 | RAR Activation                                                           | <i>Cited2, Ppargc1A</i>                                                                          | 0.035481 |
| 2         | Down               | Xenobiotic Metabolism Signaling                                          | <i>Aldh1B1, Il1A, Nras, Ugt2B, Fmo1, Ces1</i>                                                    | 0.00138  |
| 2         | Down               | Role of MAPK Signaling in the Pathogenesis of Influenza                  | <i>Cxcl10, Nras, Pnpla3</i>                                                                      | 0.002399 |
| 2         | Down               | Communication between Innate and Adaptive Immune Cells                   | <i>Cxcl10, Il1A, Cd83</i>                                                                        | 0.006761 |
| 2         | Down               | Atherosclerosis Signaling                                                | <i>Il1A, Pnpla3, Tnfrsf14</i>                                                                    | 0.007413 |
| 2         | Down               | Interferon Signaling                                                     | <i>Ifit3, Irf1</i>                                                                               | 0.00912  |
| 2         | Down               | Glycerolipid Metabolism                                                  | <i>Aldh1B1, Pnpla3, Akr1B7</i>                                                                   | 0.009333 |
| 2         | Down               | Pentose and Glucuronate Interconversions                                 | <i>Ugt2B, Akr1B7</i>                                                                             | 0.012303 |
| 2         | Down               | Thyroid Cancer Signaling                                                 | <i>Cxcl10, Nras</i>                                                                              | 0.014791 |
| 2         | Down               | Role of Hypercytokinemia/hyperchemokine in the Pathogenesis of Influenza | <i>Cxcl10, Il1A</i>                                                                              | 0.014791 |
| 2         | Down               | Bile Acid Biosynthesis                                                   | <i>Aldh1B1, Akr1C4</i>                                                                           | 0.022387 |
| 2         | Down               | Estrogen-Dependent Breast Cancer Signaling                               | <i>Nras, Akr1C4</i>                                                                              | 0.026303 |
| 2         | Down               | Activation of IRF by Cytosolic Pattern Recognition Receptors             | <i>Dhx58, Isg15</i>                                                                              | 0.02884  |
| 2         | Down               | Pyruvate Metabolism                                                      | <i>Aldh1B1, Akr1B7</i>                                                                           | 0.032359 |
| 2         | Down               | Endothelin-1 Signaling                                                   | <i>Nras, Pnpla3, Casp4</i>                                                                       | 0.033113 |
| 2         | Down               | Aggrin Interactions at Neuromuscular Junction                            | <i>Nras, Utrn</i>                                                                                | 0.033113 |
| 2         | Down               | PPAR $\alpha$ /RXR $\alpha$ Activation                                   | <i>Nras, Fasn, Ckap5</i>                                                                         | 0.034674 |
| 2         | Down               | IL-17 Signaling                                                          | <i>Cxcl10, Nras</i>                                                                              | 0.037154 |
| 2         | Down               | Pathogenesis of Multiple Sclerosis                                       | <i>Cxcl10</i>                                                                                    | 0.037154 |
| 2         | Down               | NF- $\kappa$ B Activation by Viruses                                     | <i>Nras, Tnfrsf14</i>                                                                            | 0.038019 |
| 2         | Down               | Prolactin Signaling                                                      | <i>Nras, Irf1</i>                                                                                | 0.038019 |
| 2         | Down               | LXR/RXR Activation                                                       | <i>Il1A, Fasn</i>                                                                                | 0.040738 |
| 2         | Down               | Fatty Acid Biosynthesis                                                  | <i>Fasn</i>                                                                                      | 0.041687 |
| 2         | Down               | Androgen and Estrogen Metabolism                                         | <i>Ugt2B, Akr1C4</i>                                                                             | 0.043652 |
| 4         | Up                 | Arachidonic Acid Metabolism                                              | <i>Cyp4A22</i>                                                                                   | 0.021878 |
| 4         | Up                 | Fatty Acid Metabolism                                                    | <i>Cyp4A22</i>                                                                                   | 0.022387 |
| 4         | Down               | Glucocorticoid Receptor Signaling                                        | <i>Icam1, Hspa14, Sgk1, Nfkbie, Jak2, Ccl5, Prkag1, Smarca4, Taf9B, Fos, Nfkbia, Il1B, Stat1</i> | 0.0001   |
| 4         | Down               | Pathogenesis of Multiple Sclerosis                                       | <i>Cxcl10, Ccl5, Cxcl11</i>                                                                      | 0.000224 |
| 4         | Down               | Role of PKR in Interferon Induction and Antiviral Response               | <i>Tp53, Nfkbia, Nfkbie, Stat1, Irf1</i>                                                         | 0.000245 |
| 4         | Down               | Production of Nitric Oxide and Reactive Oxygen Species in Macrophages    | <i>Fos, Ppp1R3D, Nfkbia, Rnd3, Nfkbie, Ppp1R14A, Jak2, Stat1, Irf1</i>                           | 0.000363 |
| 4         | Down               | IL-17A Signaling in Gastric Cells                                        | <i>Cxcl10, Fos, Ccl5, Cxcl11</i>                                                                 | 0.000398 |
| 4         | Down               | Dendritic Cell Maturation                                                | <i>Il1A, Icam1, Nfkbia, Nfkbie, Hla-Dqa1, Il1B, Cd83, Jak2, Stat1</i>                            | 0.000479 |
| 4         | Down               | Prolactin Signaling                                                      | <i>Myc, Fos, Jak2, Prr, Stat1, Irf1</i>                                                          | 0.000603 |
| 4         | Down               | Colorectal Cancer Metastasis Signaling                                   | <i>Tp53, Myc, Fos, Rnd3, Mmp15, Lrp6, Tcf7L1, Mmp2, Jak2, Stat1, Prkag1</i>                      | 0.000646 |
| 4         | Down               | Aryl Hydrocarbon Receptor Signaling                                      | <i>Tp53, Myc, Aldh1B1, Fos, Il1A, Il1B, Nfe2L2, Smarca4</i>                                      | 0.000776 |

## Microarray analysis in liver following burn and CLP

|   |      |                                                                                                       |                                                                                     |          |
|---|------|-------------------------------------------------------------------------------------------------------|-------------------------------------------------------------------------------------|----------|
| 4 | Down | Type I Diabetes Mellitus Signaling                                                                    | <i>Nfkbia, Nfkbie, Hla-Dqa1, Il1B, Jak2, Stat1, Irf1</i>                            | 0.000933 |
| 4 | Down | Role of BRCA1 in DNA Damage Response                                                                  | <i>Tp53, Fancc, Stat1, Fancl, Smarca4</i>                                           | 0.001175 |
| 4 | Down | Interferon Signaling                                                                                  | <i>Mx1, Jak2, Stat1, Irf1</i>                                                       | 0.001318 |
| 4 | Down | Role of Macrophages, Fibroblasts and Endothelial Cells in Rheumatoid Arthritis                        | <i>Myc, Fos, Il1A, Icam1, Nfkbia, Cebpd, Nfkbie, Lrp6, Il1B, Tcf7L1, Jak2, Ccl5</i> | 0.001349 |
| 4 | Down | IL-17A Signaling in Fibroblasts                                                                       | <i>Fos, Nfkbia, Cebpd, Nfkbie</i>                                                   | 0.001479 |
| 4 | Down | Communication between Innate and Adaptive Immune Cells                                                | <i>Cxcl10, Il1A, Ccl3L1/Ccl3L3, Il1B, Cd83, Ccl5</i>                                | 0.001905 |
| 4 | Down | Activation of IRF by Cytosolic Pattern Recognition Receptors                                          | <i>Nfkbia, Nfkbie, Stat1, Adar, Isg15</i>                                           | 0.001995 |
| 4 | Down | IL-6 Signaling                                                                                        | <i>Fos, Il1A, Nfkbia, Nfkbie, Il1B, Jak2</i>                                        | 0.002239 |
| 4 | Down | Pyruvate Metabolism                                                                                   | <i>Aldh1B1, Pklr, Acat1, Acaca, Me1</i>                                             | 0.00263  |
| 4 | Down | MIF Regulation of Innate Immunity                                                                     | <i>Tp53, Fos, Nfkbia, Nfkbie</i>                                                    | 0.002692 |
| 4 | Down | IL-10 Signaling                                                                                       | <i>Fos, Il1A, Nfkbia, Nfkbie, Il1B</i>                                              | 0.002818 |
| 4 | Down | PPAR $\alpha$ /RXR $\alpha$ Activation                                                                | <i>Nfkbia, Gpd2, Nfkbie, Acvr1, Il1B, Jak2, Adipor2, Prkag1</i>                     | 0.002951 |
| 4 | Down | Thyroid Cancer Signaling                                                                              | <i>Cxcl10, Tp53, Myc, Tcf7L1</i>                                                    | 0.003467 |
| 4 | Down | Role of Hypercytokinemia/hyperchemokineemia in the Pathogenesis of Influenza                          | <i>Cxcl10, Il1A, Il1B, Ccl5</i>                                                     | 0.003467 |
| 4 | Down | Aminosugars Metabolism                                                                                | <i>Hk2, Gnpda2, Nanp, Pde4B, Cyb561</i>                                             | 0.003631 |
| 4 | Down | IL-15 Production                                                                                      | <i>Jak2, Stat1, Irf1</i>                                                            | 0.007244 |
| 4 | Down | TREM1 Signaling                                                                                       | <i>Icam1, Il1B, Cd83, Jak2</i>                                                      | 0.007244 |
| 4 | Down | Thrombopoietin Signaling                                                                              | <i>Myc, Fos, Jak2, Stat1</i>                                                        | 0.007762 |
| 4 | Down | TNFR2 Signaling                                                                                       | <i>Fos, Nfkbia, Nfkbie</i>                                                          | 0.007943 |
| 4 | Down | Acute Phase Response Signaling                                                                        | <i>Fos, Il1A, Sod2, Nfkbia, Nfkbie, Il1B, Jak2</i>                                  | 0.01     |
| 4 | Down | IL-1 Signaling                                                                                        | <i>Fos, Il1A, Nfkbia, Nfkbie, Prkag1</i>                                            | 0.01     |
| 4 | Down | Insulin Receptor Signaling                                                                            | <i>Ppp1R3D, Sgk1, Ppp1R14A, Jak2, Ptpfr, Prkag1</i>                                 | 0.010715 |
| 4 | Down | PPAR Signaling                                                                                        | <i>Fos, Il1A, Nfkbia, Nfkbie, Il1B</i>                                              | 0.012023 |
| 4 | Down | Synthesis and Degradation of Ketone Bodies                                                            | <i>Bdh1, Acat1</i>                                                                  | 0.012023 |
| 4 | Down | TWEAK Signaling                                                                                       | <i>Nfkbia, Nfkbie, Bag4</i>                                                         | 0.012303 |
| 4 | Down | CD40 Signaling                                                                                        | <i>Fos, Icam1, Nfkbia, Nfkbie</i>                                                   | 0.012303 |
| 4 | Down | Relaxin Signaling                                                                                     | <i>Fos, Gucy1B2, Nfkbia, Nfkbie, Pde4B, Prkag1</i>                                  | 0.012303 |
| 4 | Down | Role of JAK2 in Hormone-like Cytokine Signaling                                                       | <i>Jak2, Prlr, Stat1</i>                                                            | 0.013183 |
| 4 | Down | Role of IL-17A in Psoriasis                                                                           | <i>S100A9, S100A8</i>                                                               | 0.014125 |
| 4 | Down | Nitrogen Metabolism                                                                                   | <i>Ca3, Asns, Adar</i>                                                              | 0.014454 |
| 4 | Down | Hepatic Cholestasis                                                                                   | <i>Il1A, Tjp2, Nfkbia, Nfkbie, Il1B, Prkag1</i>                                     | 0.015136 |
| 4 | Down | Hepatic Fibrosis / Hepatic Stellate Cell Activation                                                   | <i>Il1A, Icam1, Fgfr2, Il1B, Ccl5, Stat1</i>                                        | 0.015136 |
| 4 | Down | Erythropoietin Signaling                                                                              | <i>Fos, Nfkbia, Nfkbie, Jak2</i>                                                    | 0.015136 |
| 4 | Down | ERK/MAPK Signaling                                                                                    | <i>Myc, Fos, Ppp1R3D, Dusp6, Ppp1R14A, Stat1, Prkag1</i>                            | 0.016596 |
| 4 | Down | April Mediated Signaling                                                                              | <i>Fos, Nfkbia, Nfkbie</i>                                                          | 0.016596 |
| 4 | Down | Small Cell Lung Cancer Signaling                                                                      | <i>Tp53, Myc, Nfkbia, Nfkbie</i>                                                    | 0.018621 |
| 4 | Down | PDGF Signaling                                                                                        | <i>Myc, Fos, Jak2, Stat1</i>                                                        | 0.018621 |
| 4 | Down | B Cell Activating Factor Signaling                                                                    | <i>Fos, Nfkbia, Nfkbie</i>                                                          | 0.019055 |
| 4 | Down | Renin-Angiotensin Signaling                                                                           | <i>Fos, Jak2, Ccl5, Stat1, Prkag1</i>                                               | 0.019953 |
| 4 | Down | Dopamine Receptor Signaling                                                                           | <i>Ppp1R3D, Ddc, Ppp1R14A, Prkag1</i>                                               | 0.022909 |
| 4 | Down | Type II Diabetes Mellitus Signaling                                                                   | <i>Nfkbia, Pklr, Nfkbie, Adipor2, Prkag1</i>                                        | 0.024547 |
| 4 | Down | Differential Regulation of Cytokine Production in Macrophages and T Helper Cells by IL-17A and IL-17F | <i>Il1B, Ccl5</i>                                                                   | 0.026303 |
| 4 | Down | Graft-versus-Host Disease Signaling                                                                   | <i>Il1A, Hla-Dqa1, Il1B</i>                                                         | 0.027542 |
| 4 | Down | Galactose Metabolism                                                                                  | <i>Hk2, B4Galt1, Pfkf</i>                                                           | 0.02884  |
| 4 | Down | TNFR1 Signaling                                                                                       | <i>Fos, Nfkbia, Nfkbie</i>                                                          | 0.030903 |
| 4 | Down | Wnt/ $\beta$ -catenin Signaling                                                                       | <i>Tp53, Myc, Axin2, Lrp6, Acvr1, Tcf7L1</i>                                        | 0.034674 |
| 4 | Down | FXR/RXR Activation                                                                                    | <i>Il1A, Pklr, Foxa2, Il1B</i>                                                      | 0.035481 |
| 4 | Down | CDK5 Signaling                                                                                        | <i>Ppp1R3D, Egr1, Ppp1R14A, Prkag1</i>                                              | 0.035481 |
| 4 | Down | CD27 Signaling in Lymphocytes                                                                         | <i>Fos, Nfkbia, Nfkbie</i>                                                          | 0.036308 |

## Microarray analysis in liver following burn and CLP

|   |      |                                                                                                    |                                                         |          |
|---|------|----------------------------------------------------------------------------------------------------|---------------------------------------------------------|----------|
| 4 | Down | Role of Osteoblasts, Osteoclasts and Chondrocytes in Rheumatoid Arthritis                          | <i>Fos,Il1A,Nfkbia,Nfkbie,Lrp6,Il1B,Tcf7L1</i>          | 0.037154 |
| 4 | Down | Bladder Cancer Signaling                                                                           | <i>Tp53,Myc,Mmp15,Mmp24</i>                             | 0.038019 |
| 4 | Down | Differential Regulation of Cytokine Production in Intestinal Epithelial Cells by IL-17A and IL-17F | <i>Il1B,Ccl5</i>                                        | 0.038905 |
| 4 | Down | Glycolysis/Gluconeogenesis                                                                         | <i>Aldh1B1,Hk2,Pklr,Pfkm</i>                            | 0.039811 |
| 4 | Down | Cardiac $\beta$ -adrenergic Signaling                                                              | <i>Akap13,PPP1R3D,PPP1R14A,Pde4B,Prkag1</i>             | 0.040738 |
| 4 | Down | Role of IL-17A in Arthritis                                                                        | <i>Nfkbia,Nfkbie,Ccl5</i>                               | 0.041687 |
| 4 | Down | Maturity Onset Diabetes of Young (MODY) Signaling                                                  | <i>Pklr,Foxa2</i>                                       | 0.041687 |
| 4 | Down | NRF2-mediated Oxidative Stress Response                                                            | <i>Fos,Sod2,Dnajc4,Dnajc14,Fmo1,Nfe2L2</i>              | 0.043652 |
| 4 | Down | HMGBl Signaling                                                                                    | <i>Fos,Il1A,Icam1,Rnd3</i>                              | 0.045709 |
| 4 | Down | Atherosclerosis Signaling                                                                          | <i>Il1A,Icam1,Il1B,Tnfrsf14</i>                         | 0.045709 |
| 4 | Down | Role of JAK1, JAK2 and TYK2 in Interferon Signaling                                                | <i>Jak2,Stat1</i>                                       | 0.045709 |
| 4 | Down | Propanoate Metabolism                                                                              | <i>Aldh1B1,Acat1,Acaca</i>                              | 0.047863 |
| 4 | Down | Role of JAK family kinases in IL-6-type Cytokine Signaling                                         | <i>Jak2,Stat1</i>                                       | 0.048978 |
| 8 | Up   | Glycine, Serine and Threonine Metabolism                                                           | <i>Sardh,Gnmt,Chdh,Alas1,Elovl6</i>                     | 4.79E-06 |
| 8 | Up   | Protein Ubiquitination Pathway                                                                     | <i>Hspa8,Usp15,Hsph1,Hsp90Aa1,Ube2E2,Anapc11,Dnaja1</i> | 3.39E-05 |
| 8 | Up   | Urea Cycle and Metabolism of Amino Groups                                                          | <i>Sardh,Ass1,Asl</i>                                   | 0.000186 |
| 8 | Up   | Complement System                                                                                  | <i>Serp1g1,C9,Cfb</i>                                   | 0.000204 |
| 8 | Up   | Acute Phase Response Signaling                                                                     | <i>Il33,Serp1g1,Ftl,C9,Cfb</i>                          | 0.000288 |
| 8 | Up   | Phenylalanine Metabolism                                                                           | <i>Dhcr24,Aldh1L1,Elovl6</i>                            | 0.000339 |
| 8 | Up   | Metabolism of Xenobiotics by Cytochrome P450                                                       | <i>Gsta4,Aldh1L1,Cyp2C44,Cyp51A1</i>                    | 0.000692 |
| 8 | Up   | Aldosterone Signaling in Epithelial Cells                                                          | <i>Hspa8,Hsph1,Hsp90Aa1,Dnaja1</i>                      | 0.001995 |
| 8 | Up   | Arginine and Proline Metabolism                                                                    | <i>Ass1,Asl,Amd1</i>                                    | 0.002138 |
| 8 | Up   | One Carbon Pool by Folate                                                                          | <i>Aldh1L1,Mthfd1</i>                                   | 0.002188 |
| 8 | Up   | Biosynthesis of Steroids                                                                           | <i>Ebp,Hmgcr</i>                                        | 0.002399 |
| 8 | Up   | Methionine Metabolism                                                                              | <i>Mat1A,Amd1</i>                                       | 0.004898 |
| 8 | Up   | Alanine and Aspartate Metabolism                                                                   | <i>Ass1,Asl</i>                                         | 0.008128 |
| 8 | Up   | Tryptophan Metabolism                                                                              | <i>Dhcr24,Cyp2C44,Cyp51A1</i>                           | 0.010715 |
| 8 | Up   | Aryl Hydrocarbon Receptor Signaling                                                                | <i>Sp1,Aldh1L1,Hsp90Aa1</i>                             | 0.012303 |
| 8 | Up   | Histidine Metabolism                                                                               | <i>Aldh1L1,Elovl6</i>                                   | 0.013183 |
| 8 | Up   | Mitotic Roles of Polo-Like Kinase                                                                  | <i>Hsp90Aa1,Anapc11</i>                                 | 0.019953 |
| 8 | Up   | Hypoxia Signaling in the Cardiovascular System                                                     | <i>Hsp90Aa1,Ube2E2</i>                                  | 0.022909 |
| 8 | Up   | IL-10 Signaling                                                                                    | <i>Il33,Sp1</i>                                         | 0.023442 |
| 8 | Up   | PXR/RXR Activation                                                                                 | <i>Abcb11,Alas1</i>                                     | 0.024547 |
| 8 | Up   | Aminosugars Metabolism                                                                             | <i>Por,Sacm1L</i>                                       | 0.026303 |
| 8 | Up   | Tyrosine Metabolism                                                                                | <i>Aldh1L1,Elovl6</i>                                   | 0.026915 |
| 8 | Up   | LXR/RXR Activation                                                                                 | <i>Il33,Hmgcr</i>                                       | 0.02884  |
| 8 | Up   | Linoleic Acid Metabolism                                                                           | <i>Cyp2C44,Cyp51A1</i>                                  | 0.029512 |
| 8 | Up   | LPS/IL-1 Mediated Inhibition of RXR Function                                                       | <i>Abcb11,Aldh1L1,Alas1</i>                             | 0.033113 |
| 8 | Up   | FXR/RXR Activation                                                                                 | <i>Il33,Abcb11</i>                                      | 0.037154 |
| 8 | Up   | PPAR Signaling                                                                                     | <i>Il33,Hsp90Aa1</i>                                    | 0.044668 |
| 8 | Up   | Nicotinate and Nicotinamide Metabolism                                                             | <i>Hipk1,Sacm1L</i>                                     | 0.047863 |
| 8 | Down | Synthesis and Degradation of Ketone Bodies                                                         | <i>Acat1</i>                                            | 0.006457 |
| 8 | Down | Antiproliferative Role of TOB in T Cell Signaling                                                  | <i>Cdkn1B</i>                                           | 0.014125 |
| 8 | Down | Nitrogen Metabolism                                                                                | <i>Ca3</i>                                              | 0.019498 |
| 8 | Down | Cell Cycle: G1/S Checkpoint Regulation                                                             | <i>Cdkn1B</i>                                           | 0.0302   |
| 8 | Down | Propanoate Metabolism                                                                              | <i>Acat1</i>                                            | 0.0302   |
| 8 | Down | Butanoate Metabolism                                                                               | <i>Acat1</i>                                            | 0.032359 |
| 8 | Down | Lysine Degradation                                                                                 | <i>Acat1</i>                                            | 0.033113 |
| 8 | Down | Antiproliferative Role of Somatostatin Receptor 2                                                  | <i>Cdkn1B</i>                                           | 0.033884 |
| 8 | Down | Pyruvate Metabolism                                                                                | <i>Acat1</i>                                            | 0.035481 |
| 8 | Down | Valine, Leucine and Isoleucine Degradation                                                         | <i>Acat1</i>                                            | 0.035481 |
| 8 | Down | Small Cell Lung Cancer Signaling                                                                   | <i>Cdkn1B</i>                                           | 0.038019 |
| 8 | Down | HER-2 Signaling in Breast Cancer                                                                   | <i>Cdkn1B</i>                                           | 0.040738 |

## Microarray analysis in liver following burn and CLP

|     |      |                                                            |                     |          |
|-----|------|------------------------------------------------------------|---------------------|----------|
| 8   | Down | VDR/RXR Activation                                         | <i>Cdkn1B</i>       | 0.041687 |
| 8   | Down | Cyclins and Cell Cycle Regulation                          | <i>Cdkn1B</i>       | 0.041687 |
| 8   | Down | Prostate Cancer Signaling                                  | <i>Cdkn1B</i>       | 0.042658 |
| 8   | Down | Neuregulin Signaling                                       | <i>Cdkn1B</i>       | 0.046774 |
| 12  | Up   | Tyrosine Metabolism                                        | <i>Adh1C,Aox1</i>   | 0.000525 |
| 12  | Up   | Metabolism of Xenobiotics by Cytochrome P450               | <i>Adh1C,Cyp2B6</i> | 0.001288 |
| 12  | Up   | Fatty Acid Metabolism                                      | <i>Adh1C,Cyp2B6</i> | 0.001514 |
| 12  | Up   | Tryptophan Metabolism                                      | <i>Aox1,Cyp2B6</i>  | 0.00166  |
| 12  | Up   | Inhibition of Angiogenesis by TSP1                         | <i>Cd36</i>         | 0.016218 |
| 12  | Up   | Retinol Metabolism                                         | <i>Adh1C</i>        | 0.02138  |
| 12  | Up   | Bile Acid Biosynthesis                                     | <i>Adh1C</i>        | 0.026303 |
| 12  | Up   | Valine, Leucine and Isoleucine Degradation                 | <i>Aox1</i>         | 0.031623 |
| 12  | Up   | PXR/RXR Activation                                         | <i>Cyp2B6</i>       | 0.033113 |
| 12  | Up   | Arginine and Proline Metabolism                            | <i>Prodh</i>        | 0.034674 |
| 12  | Up   | LXR/RXR Activation                                         | <i>Cd36</i>         | 0.036308 |
| 12  | Up   | Linoleic Acid Metabolism                                   | <i>Cyp2B6</i>       | 0.036308 |
| 12  | Up   | FXR/RXR Activation                                         | <i>Cyp8B1</i>       | 0.041687 |
| 12  | Up   | Glycolysis/Gluconeogenesis                                 | <i>Adh1C</i>        | 0.042658 |
| 12  | Up   | Atherosclerosis Signaling                                  | <i>Cd36</i>         | 0.044668 |
| 12  | Up   | Nicotinate and Nicotinamide Metabolism                     | <i>Aox1</i>         | 0.046774 |
| 12  | Up   | Glycerolipid Metabolism                                    | <i>Adh1C</i>        | 0.048978 |
| 12  | Down | NRF2-mediated Oxidative Stress Response                    | <i>Sod2,Gstm3</i>   | 0.001698 |
| 12  | Down | Riboflavin Metabolism                                      | <i>Acpp</i>         | 0.007244 |
| 12  | Down | IL-9 Signaling                                             | <i>Cish</i>         | 0.012303 |
| 12  | Down | Neuroprotective Role of THOP1 in Alzheimer's Disease       | <i>Hla-G</i>        | 0.014454 |
| 12  | Down | Antigen Presentation Pathway                               | <i>Hla-G</i>        | 0.014454 |
| 12  | Down | Graft-versus-Host Disease Signaling                        | <i>Hla-G</i>        | 0.016596 |
| 12  | Down | Autoimmune Thyroid Disease Signaling                       | <i>Hla-G</i>        | 0.016982 |
| 12  | Down | Glutathione Metabolism                                     | <i>Gstm3</i>        | 0.02138  |
| 12  | Down | JAK/Stat Signaling                                         | <i>Cish</i>         | 0.021878 |
| 12  | Down | GM-CSF Signaling                                           | <i>Cish</i>         | 0.022387 |
| 12  | Down | Cytotoxic T Lymphocyte-mediated Apoptosis of Target Cells  | <i>Hla-G</i>        | 0.02884  |
| 12  | Down | Allograft Rejection Signaling                              | <i>Hla-G</i>        | 0.029512 |
| 12  | Down | OX40 Signaling Pathway                                     | <i>Hla-G</i>        | 0.030903 |
| 12  | Down | Crosstalk between Dendritic Cells and Natural Killer Cells | <i>Hla-G</i>        | 0.032359 |
| 12  | Down | Communication between Innate and Adaptive Immune Cells     | <i>Hla-G</i>        | 0.032359 |
| 12  | Down | Type I Diabetes Mellitus Signaling                         | <i>Hla-G</i>        | 0.038905 |
| 12  | Down | Metabolism of Xenobiotics by Cytochrome P450               | <i>Gstm3</i>        | 0.040738 |
| 12  | Down | Mitochondrial Dysfunction                                  | <i>Sod2</i>         | 0.047863 |
| 12  | Down | Aryl Hydrocarbon Receptor Signaling                        | <i>Gstm3</i>        | 0.048978 |
| 24  | Down | Pyruvate Metabolism                                        | <i>Me2,Adh4</i>     | 0.001413 |
| 24  | Down | Lysine Biosynthesis                                        | <i>Adh4</i>         | 0.009333 |
| 24  | Down | IL-9 Signaling                                             | <i>Socs2</i>        | 0.028184 |
| 24  | Down | Role of JAK2 in Hormone-like Cytokine Signaling            | <i>Socs2</i>        | 0.02884  |
| 24  | Down | Nitrogen Metabolism                                        | <i>Ca3</i>          | 0.0302   |
| 24  | Down | Pentose and Glucuronate Interconversions                   | <i>Adh4</i>         | 0.033113 |
| 24  | Down | Retinol Metabolism                                         | <i>Adh4</i>         | 0.037154 |
| 24  | Down | Galactose Metabolism                                       | <i>Adh4</i>         | 0.038905 |
| 24  | Down | Axonal Guidance Signaling                                  | <i>Rgs3,Fzd1</i>    | 0.041687 |
| 24  | Down | Fructose and Mannose Metabolism                            | <i>Adh4</i>         | 0.042658 |
| 24  | Down | Bile Acid Biosynthesis                                     | <i>Adh4</i>         | 0.045709 |
| 24  | Down | JAK/Stat Signaling                                         | <i>Socs2</i>        | 0.050119 |
| 120 | Up   | Cell Cycle: G1/S Checkpoint Regulation                     | <i>Hdac4,Cdkn2B</i> | 0.014454 |
| 120 | Up   | Cyclins and Cell Cycle Regulation                          | <i>Hdac4,Cdkn2B</i> | 0.027542 |

## Microarray analysis in liver following burn and CLP

|     |      |                                                            |                       |          |
|-----|------|------------------------------------------------------------|-----------------------|----------|
| 120 | Up   | Valine, Leucine and Isoleucine Biosynthesis                | <i>Vars</i>           | 0.038019 |
| 120 | Up   | Role of IL-17A in Psoriasis                                | <i>S100A9</i>         | 0.041687 |
| 120 | Down | Fatty Acid Biosynthesis                                    | <i>Fasn,Acaca</i>     | 0.000214 |
| 120 | Down | TR/RXR Activation                                          | <i>Fasn,Acaca,Me1</i> | 0.000891 |
| 120 | Down | Mitotic Roles of Polo-Like Kinase                          | <i>Slk,Plk2</i>       | 0.008511 |
| 120 | Down | Pyruvate Metabolism                                        | <i>Acaca,Me1</i>      | 0.009772 |
| 120 | Down | Tyrosine Metabolism                                        | <i>Comt,Elov16</i>    | 0.011482 |
| 120 | Down | LXR/RXR Activation                                         | <i>Fasn,Acaca</i>     | 0.012589 |
| 120 | Down | Dopamine Receptor Signaling                                | <i>Comt,PPP1R3C</i>   | 0.012589 |
| 120 | Down | Glycerophospholipid Metabolism                             | <i>Bche,Elov16</i>    | 0.0302   |
| 120 | Down | DNA Double-Strand Break Repair by Homologous Recombination | <i>Gen1</i>           | 0.030903 |
| 120 | Down | AMPK Signaling                                             | <i>Fasn,Acaca</i>     | 0.036308 |
| 120 | Down | Polyamine Regulation in Colon Cancer                       | <i>Myc</i>            | 0.047863 |

## Microarray analysis in liver following burn and CLP

**Supplementary Table 2.** Total Number of Genes Identified as Significantly Different via SAM

Number of Genes Identified by SAM at each time point

|                 | 2h  | 4h  | 8h | 12h | 16h | 20h | 24h | 48 hr | 120 hr | 196 hr |
|-----------------|-----|-----|----|-----|-----|-----|-----|-------|--------|--------|
| Up regulation   | 45  | 9   | 82 | 10  | 0   | 0   | 0   | 0     | 107    | 0      |
| Down regulation | 144 | 426 | 15 | 11  | 0   | 0   | 35  | 0     | 73     | 0      |
